# Supplementary material for: Interacting tipping elements increase risk of climate domino effects under global warming
Source: Copernicus journal article supplement (doi:10.5194/esd-2020-18), 2020-04-03
Supplement: Supplementary file 1 [file esd-2020-18-supplement.pdf]

# Supplementary Material of Interacting tipping elements increase risk of climate domino effects under global warming

Nico Wunderling<sup>1,2,3</sup>, Jonathan F. Donges<sup>1,4</sup>, Jürgen Kurths<sup>1,5</sup>, and Ricarda Winkelmann<sup>1,2</sup>

<sup>1</sup>Earth System Analysis and Complexity Science, Potsdam Institute for Climate Impact, Research (PIK), Member of the Leibniz Association, 14473 Potsdam, Germany

<sup>2</sup>Institute of Physics and Astronomy, University of Potsdam, 14476 Potsdam, Germany

<sup>3</sup>Department of Physics, Humboldt University of Berlin, 12489 Berlin, Germany

<sup>4</sup>Stockholm Resilience Centre, Stockholm University, Stockholm, SE-10691, Sweden

<sup>5</sup>Saratov State University, Saratov, RU-410012, Russia

**Correspondence:** Nico Wunderling (nico.wunderling@pik-potsdam.de), Ricarda Winkelmann (ricarda.winkelmann@pik-potsdam.de)

| Parameter group                              | Parameter                               | Initial value |
|----------------------------------------------|-----------------------------------------|---------------|
| Critical temperatures ( $^{\circ}\text{C}$ ) | $T_{\text{limit, Greenland}}$           | 2.5           |
|                                              | $T_{\text{limit, West Antarctica}}$     | 2.1           |
|                                              | $T_{\text{limit, AMOC}}$                | 5.1           |
|                                              | $T_{\text{limit, ENSO}}$                | 5.5           |
|                                              | $T_{\text{limit, Amazon rainforest}}$   | 3.5           |
| Strong links (a.u.)                          | Greenland $\rightarrow$ AMOC            | 0.32          |
|                                              | AMOC $\rightarrow$ Greenland            | -0.17         |
|                                              | Greenland $\rightarrow$ West Antarctica | 0.25          |
|                                              | ENSO $\rightarrow$ Amazon rainforest    | 0.27          |
| Intermediate links (a.u.)                    | ENSO $\rightarrow$ West Antarctica      | 0.26          |
|                                              | AMOC $\rightarrow$ Amazon rainforest    | 0.0           |
|                                              | West Antarctica $\rightarrow$ AMOC      | 0.0           |
| Weak links (a.u.)                            | AMOC $\rightarrow$ ENSO                 | 0.20          |
|                                              | West Antarctica $\rightarrow$ Greenland | 0.19          |
|                                              | ENSO $\rightarrow$ AMOC                 | -0.12         |
|                                              | AMOC $\rightarrow$ West Antarctica      | 0.12          |
|                                              | Amazon rainforest $\rightarrow$ ENSO    | 0.0           |

**Table S 1.** Exemplary initial values in Fig. 2. All initial values are random numbers drawn from a random, uniform distribution with a latin-hypercube sampling algorithm (Baudin, 2013) between their respective limits (see Tabs. 1 and 2). The random numbers for the links have already been multiplied with  $1/10 \times s_{ij}$  (see Table 2). The exemplary timelines were computed using a network without considering the uncertain links (AMOC  $\rightarrow$  Amazon rainforest, West Antarctica  $\rightarrow$  AMOC and Amazon rainforest  $\rightarrow$  ENSO), whose link strengths are set to zero (see Fig. 2).

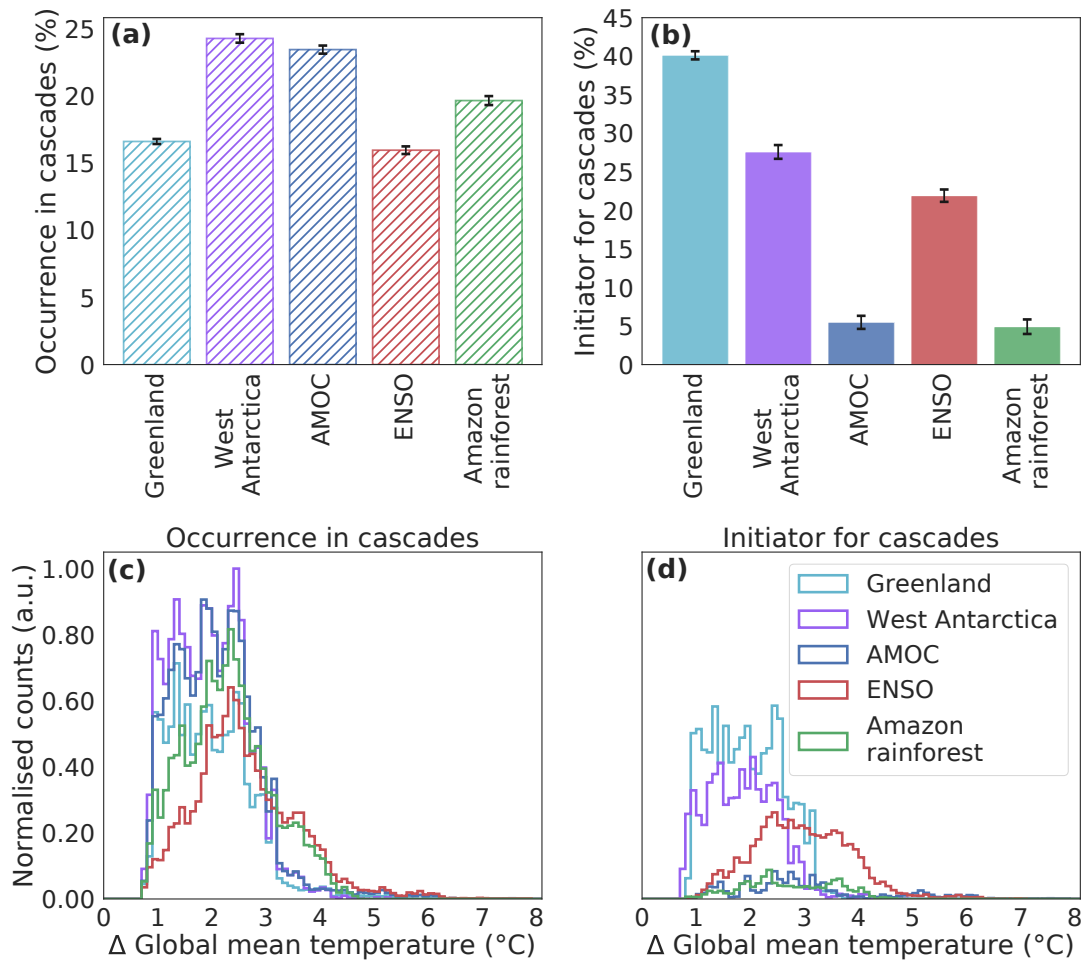

**Figure S 1.** Role of tipping elements in cascades. **(a)** Relative frequency in percent of occurrence of a certain tipping element in a tipping cascade (hatched bars). The standard deviation is computed by evaluating the deviation between reasonable network settings (see Section 2.5, *Model initialisation and uncertainty*). **(b)** Relative frequency in percent that a certain tipping element causes a tipping cascade (coloured bars). We define that the cause of a cascade is the element, whose critical temperature is closest to the temperature of the cascade. Again the error bars show the standard deviation between different network settings as in **(a)**. **(c)** Count versus global mean temperature increase at which a tipping cascade occurs divided into the respective five tipping elements. **(d)** Same as in **(c)**, but for the tipping element which causes the cascade. N.B.: **(c)** and **(d)** are set to the same scale normalised to the highest value in the histogram.

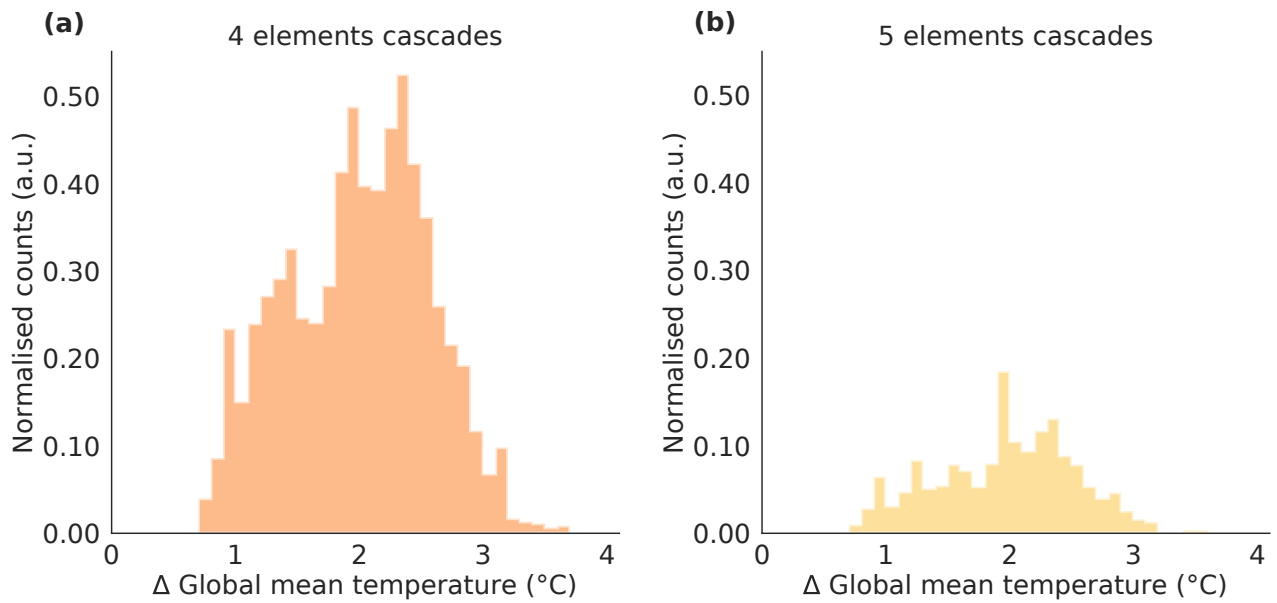

**Figure S 2.** Tipping cascades of size four and five versus temperature increase. **(a)** Tipping cascades of size four, **(b)** Tipping cascades of size five. The scale is the same as in Figs. 4(c, d), but here we show a zoom-in in temperature increase and normalised counts to improve visibility.

## References

Baudin, M.: pyDOE: The experimental design package for python, software available under the BSD license (3-Clause) at <https://pythonhosted.org/pyDOE/index.html>, 2013.
